# Supplementary material for: Synthesis of a novel organic–inorganic hybrid of polyaniline/titanium phosphate for Re(vii) removal
Source: Royal Society of Chemistry journal article supplement (doi:10.1039/c5dt01093d), 2015-01-01
Supplement: c5dt01093d1.pdf [file c5dt01093d1.pdf]

## Electronic Supplementntary Information on

### Synthesis of a novel organic–inorganic hybrid of polyaniline / titanium phosphate for Re(VII) removal

Yang Gao, Changlun Chen, He Chen, Rui Zhang and Xiangke Wang

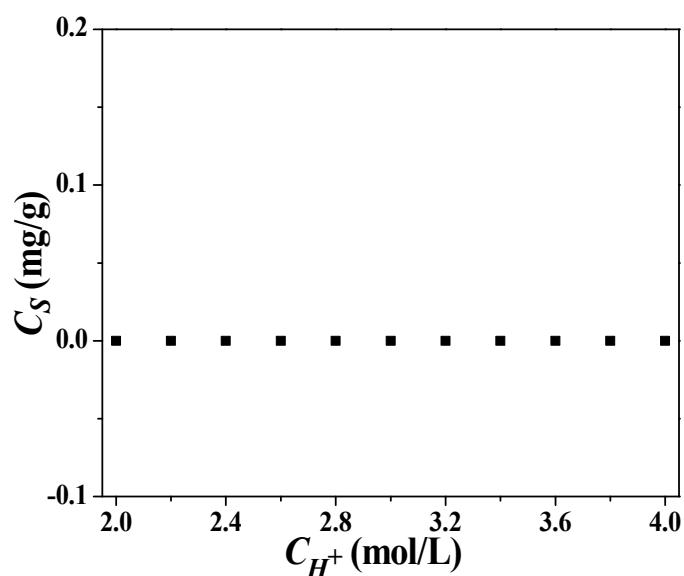

**Fig. S1** Re (VII) sorption to PANI/Ti(HPO<sub>4</sub>)<sub>2</sub> as a function of the concentration of H<sup>+</sup>.

$m/V = 0.1$  g/L,  $C_{[\text{Re(VII)}]\text{initial}} = 10.00$  mg/L,  $I = 0.001$  mol/L NaNO<sub>3</sub>, and  $T = 293$  K.

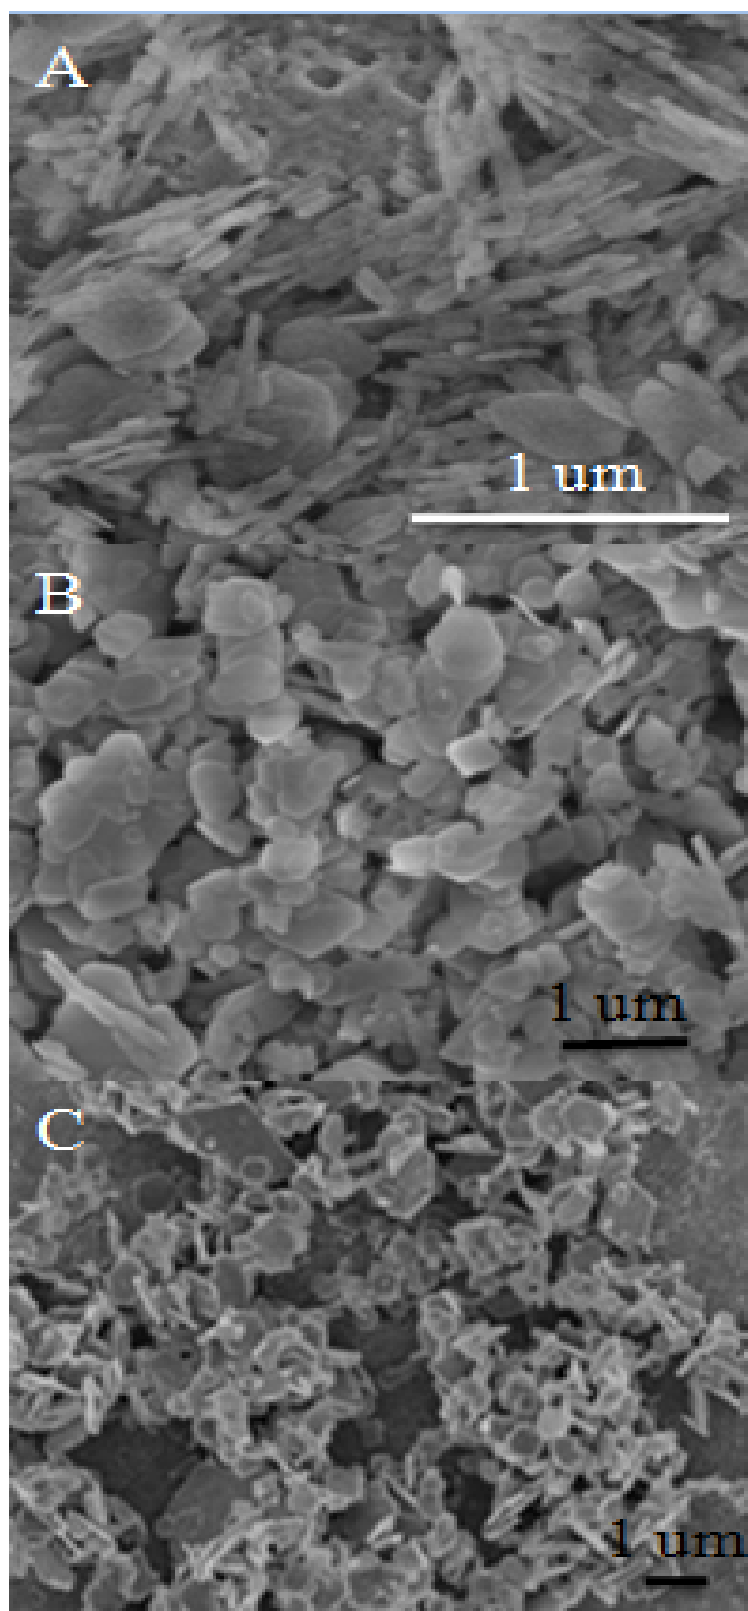

**Fig. S2** SEM images of  $\text{Ti}(\text{HPO}_4)_2$  in different stirring rate (A) 1500 rpm , (B) 1000 rpm, and (C) 500 rpm.
